# Supplementary material for: BMI, Waist Circumference, and Waist-to-hip Trajectories and All-cause, CVD, and Cancer Mortality by Sex in Nondiabetic People
Source: Research Square preprint supplement (doi:10.21203/rs.3.rs-5321579/v1), 2024-11-20
Supplement: Supplementary file 1 [file b50aaa0b9eaedd3f740b283f.docx]

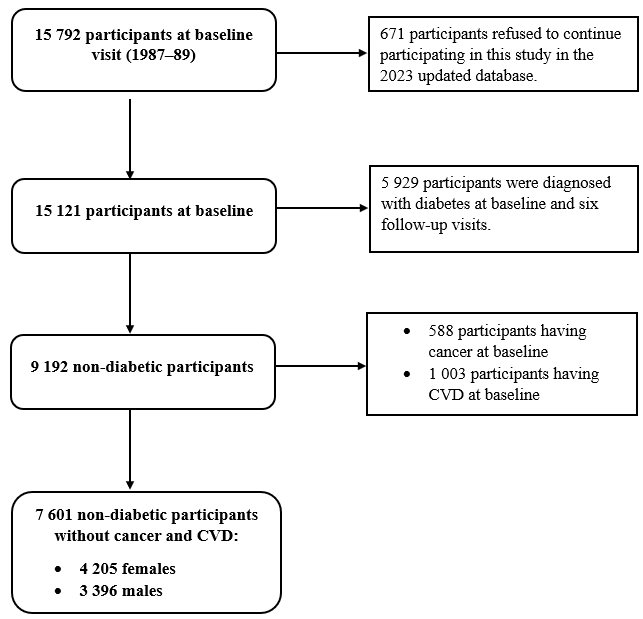


**Supplemental Figure 1.** The flowchart for the inclusion and exclusion of study participants.

| **Trajectory patterns** | | **Median ± IQR** (years) | ***p-value*** | **Mean ± SE** (years) | ***p-value*** |
| --- | --- | --- | --- | --- | --- |
| **BMI** | |  |  |  |  |
| Females | Low level | 77±14 | 0.846 | 75.9±0.42 | 0.955 |
|  | Moderate level | 77±14 |  | 75.9±0.44 |  |
|  | Low level | 75±16 | 0.919 | 73.9±0.84 | 0.977 |
|  | High level | 76±13 |  | 73.9±0.76 |  |
| Males | Low level | 75±14 | 0.177 | 74.2±0.38 | 0.187 |
|  | Moderate level | 76±14 |  | 74.9±0.39 |  |
|  | Low level | 75±14 | **0.044** | 74.0±0.77 | 0.100 |
|  | High level | 73±12 |  | 72.3±0.66 |  |
| **Waist circumference** | |  |  |  |  |
| Females | Low level | 77±14 | 0.201 | 75.4±0.43 | 0.244 |
|  | Moderate level | 77±13 |  | 76.1±0.44 |  |
|  | Low level | 76.3±15 | 0.261 | 75.3±0.58 | 0.277 |
|  | High level | 76.8±13 |  | 76.1±0.56 |  |
| Males | Low level | 75±14 | 0.980 | 74.3±0.41 | 0.841 |
|  | Moderate level | 75±12 |  | 74.2±0.40 |  |
|  | Low level | 76±13 | **0.001** | 75.3±0.58 | **0.003** |
|  | High level | 73±12 |  | 73.0±0.50 |  |
| **Waist-to-hip ratio** | |  |  |  |  |
| Females | Low level | 77±14 | 0.397 | 75.0±0.58 | 0.582 |
|  | Moderate level | 76±13 |  | 74.6±0.50 |  |
|  | Low level | 78±14 | 0.889 | 76.0±0.68 | 0.851 |
|  | High level | 77±13 |  | 75.8±0.63 |  |
| Males | Low level | 74±14 | 0.986 | 73.1±0.57 | 0.955 |
|  | Moderate level | 75±14 |  | 73.2±0.54 |  |
|  | Low level | 74±14 | 0.793 | 73.9±0.68 | 0.647 |
|  | High level | 75±14 |  | 73.4±0.63 |  |

**Supplemental Table 1** Lifespan by BMI, waist circumference, and waist-to-hip trajectory patterns among the ARIC deceased nondiabetic people.

*Note*: The bold values are statistically significant. BMI= body mass index.

**Supplemental Table 2.** Hazard ratios for the association of BMI, waist circumference, waist-to-hip trajectory patterns with all-cause, CVD, and cancer mortality among the ARIC nondiabetic people before dealing with missing covariates values.

|  | **Trajectory pattern** | **All-cause mortality** | **CVD mortality** | **Cancer mortality** |
| --- | --- | --- | --- | --- |
| HR (95% CI) | HR (95% CI) | HR (95% CI) |
|  | **BMI** |  |  |  |
| **Female** | Low level | 1.00 | 1.00 | 1.00 |
|  | Moderate level | 1.00(0.89-1.14) | 1.07(0.85-1.35) | 1.12(0.90-1.39) |
|  | High level | 1.12(0.89-1.43) | 0.96(0.63-1.47) | **1.43(1.03-2.18)** |
| **Male** | Low level | 1.00 | 1.00 | 1.00 |
|  | Moderate level | 0.98(0.88-1.10) | 1.09(0.87-1.36) | 0.94(0.79-1.14) |
|  | High level | 1.15(0.93-1.42) | 1.20(0.83-1.73) | 1.06(0.74-1.50) |
|  | **Waist circumference** | |  |  |
| **Female** | Low level | 1.00 | 1.00 | 1.00 |
|  | Moderate level | 1.03(0.90-1.17) | 0.90(0.70-1.15) | 1.15(0.92-1.44) |
|  | High level | 1.12(0.94-1.34) | 1.14(0.83-1.58) | 1.34(0.98-1.84) |
| **Male** | Low level | 1.00 | 1.00 | 1.00 |
|  | Moderate level | 1.05(0.95-1.19) | 1.07(0.85-1.35) | 1.02(0.84-1.25) |
|  | High level | **1.37(1.16-1.62)** | **1.39(1.01-1.91)** | **1.35(1.03-1.77)** |
|  | **Waist-to-hip ratio** | |  |  |
| **Female** | Low level | 1.00 | 1.00 | 1.00 |
|  | Moderate level | **1.20(1.02-1.41)** | **1.45(1.03-2.03)** | 1.26(0.96-1.66) |
|  | High level | **1.22(1.00-1.48)** | **1.52(1.05-2.22)** | 1.31(0.92-1.86) |
| **Male** | Low level | 1.00 | 1.00 | 1.00 |
|  | Moderate level | 0.96(0.81-1.13) | 0.94(0.69-1.28) | 1.05(0.81-1.36) |
|  | High level | **1.21(1.00-1.46)** | 1.32(0.91-1.91) | 0.83(0.60-1.15) |

*Note*: The bold values are statistically significant. BMI= body mass index; CVD=cardiovascular disease; HR=hazard ratio; CI=confidence interval.
